# Supplementary material
Source: HighWire-hosted journal article supplement (http://pharmrev.aspetjournals.org/highwire/filestream/24964/field_highwire_adjunct_files/0/1070_supp_table.pdf)
Supplement: 1070_supp_table.pdf [file 1070_supp_table.pdf]

## Therapeutic advantage of combinatorial CAR T cell and chemo-therapies

Meghan B. Ward\*, Amber B. Jones\*, Giedre Krenciute

Pharmacological Reviews:

MS ID#: PHARMREV-AR-2023-001070R1

**Supplementary Table 1: Expanded list of preclinical CAR T and chemotherapy studies including relevant mechanisms of action**

| Drug (s) |                                     | FDA Appr. (Y/N) | Drug Description           | CAR Target (s) | Tumor Model (s)         | CAR Limitation (s) Addressed | Relevant Biological Mechanism(s)                                                                                          | PMID     |
|----------|-------------------------------------|-----------------|----------------------------|----------------|-------------------------|------------------------------|---------------------------------------------------------------------------------------------------------------------------|----------|
| 1        | All trans retanoic acid (tretinoin) | Yes             | Vitamin A Derived Retinoid | BCMA           | Multiple Myeloma        | Antigen Dilema               | Enhanced antigen expression on primary myeloma cells                                                                      | 36722406 |
| 2        | All trans retanoic acid (tretinoin) | Yes             | Vitamin A Derived Retinoid | CD38           | Multiple Myeloma        | Antigen Dilema               | Upregulated antigen expression on tumor cells which potentiated CAR T cell killing                                        | 36918219 |
| 3        | Azacitidine                         | Yes             | Hypomehylating Agent       | CD70           | Acute Myeloid Leukemia  | Antigen Dilema               | Increased antigen expression on tumor cells in a high tumor burden bearing model                                          | 35452603 |
| 4        | Bryostatin-1                        | Yes             | modulate Protein Kinase C  | CD22           | Leukemias and lymphomas | Antigen Dilema               | Upregulated CD22 on different leukemia and lymphoma cells which improved CAR T cell functionality and in vivo persistence | 31110075 |
| 5        | Bryostatin-1                        | Yes             | modulate Protein Kinase C  | CD22           | B-ALL                   | Antigen Dilema               | Increased cytolysis through enhanced antigen expression on cancer cell lines while sparing normal cells                   | 35222407 |
| 6        | Cisplatin                           | Yes             | Alkylating Agent           | CD133          | Gastric Cancer          | Antigen Dilema               | Pretreatment of tumor cells with drug improved tumor cell killing by CAR T cells                                          | 33635343 |
| 7        | Crenolanib                          | Yes             | Kinase Inhibitor           | FLT3           | Acute Myeloid Leukemia  | Antigen Dilema               | Upregulated antigen expression leading to increased CAR T cell mediated killing                                           | 29472720 |
| 8        | Cyclophosphamide                    | Yes             | Lymphodepleting Agent      | NKG2D ligands  | Off-Target Study Only   | Antigen Dilema               | Upregulated NKG2D ligands which improved cytotoxicity of CAR T cells                                                      | 26122933 |

|    |                          |     |                                          |                |                         |                |                                                                                                                                                           |          |
|----|--------------------------|-----|------------------------------------------|----------------|-------------------------|----------------|-----------------------------------------------------------------------------------------------------------------------------------------------------------|----------|
| 9  | Decitabine               | Yes | Hypomethylating Agent                    | CSPG4          | Ovarian Cancer          | Antigen Dilema | Mediated a dose dependent increase in CSPG4 on antigen negative cells enhancing recognition by CAR T cells                                                | 36291817 |
| 10 | Decitabine               | Yes | Hypomethylating Agent                    | CD19           | Lymphoblastoma          | Antigen Dilema | Increased antigen expression on tumor cells improving CAR T cell mediated killing                                                                         | 31372000 |
| 11 | Decitabine and Chidamide | Yes | Hypomethylating Agent and HDAC Inhibitor | nanobodyCD70   | Acute Myeloid Leukemia  | Antigen Dilema | Combinatorial treatment enhanced the expression of CD70 on AML cells which facilitated greater cytotoxic activity of CAR T cell                           | 36932256 |
| 12 | Gemcitabine              | Yes | Antimetabolite                           | GRP78          | Pancreatic Cancer       | Antigen Dilema | Increased surface antigen expression leading to increased tumor killing by CAR T cells                                                                    | 37897831 |
| 13 | Ingenol-3-angelate       | Yes | Protein Kinase C Agonist                 | B7-H3          | Osteosarcoma            | Antigen Dilema | Increased surface expression of B7-H3 via PKC activation                                                                                                  | 38561833 |
| 14 | Lenalidomide             | Yes | Immunomodulatory Agent                   | MUC1           | Multiple Myeloma        | Antigen Dilema | Increased antigen expression on tumor cells improving CAR T cell mediated killing                                                                         | 35840578 |
| 15 | Lorlatinib               | Yes | Broad Kinase Inhibitor                   | CD19, GD2, ALK | Leukemia, Neuroblastoma | Antigen Dilema | Increased antigen expression on low antigen density cells potentiating CAR T cell effector function                                                       | 38039964 |
|    |                          |     |                                          |                |                         |                |                                                                                                                                                           |          |
| 16 | ABT-737                  | No  | Bcl-2 Inhibitor                          | CD19           | B Cell Malignancy       | Tumor Burden   | Increased tumor cell apoptosis                                                                                                                            | 23788110 |
| 17 | Azacitidine              | Yes | Hypomethylating Agent                    | CEA            | Colorectal Cancer       | Tumor Burden   | Increased antigen expression on tumor cells and improved cytotoxic effect of CAR T cells which may be of resistant to other chemotherapy resistant models | 30075754 |
| 18 | Celecoxib                | Yes | COX2 Inhibitor                           | CD19           | B Cell Malignancy       | Tumor Burden   | Partially reversed CAR T cell resistance of tumor cell lines                                                                                              | 29904021 |

|    |                 |     |                        |              |                               |              |                                                                                                                                                                       |          |
|----|-----------------|-----|------------------------|--------------|-------------------------------|--------------|-----------------------------------------------------------------------------------------------------------------------------------------------------------------------|----------|
| 19 | Dabrafenib      | Yes | MAPK Inhibitor         | GD2          | Melanoma                      | Tumor Burden | Used in the clinic to treat melanoma, need to see if can be used in combination but little impact on CAR T cell function individually                                 | 25415284 |
| 20 | Decitabine      | Yes | Hypomethylating Agent  | EGFR, CD44v6 | Bladder cancer                | Tumor Burden | Differential regulated the expression of cell survival and apoptosis factors skewing the balance towards more apoptosis sensitivity which enhanced CAR T cell killing | 34868059 |
| 21 | Fluorouracil    | Yes | Anti-Metabolite        | CEA          | Colorectal Cancer             | Tumor Burden | Increased antigen expression on tumor cells but negatively influenced the viability of the CAR T cells                                                                | 30075754 |
| 22 | Indometacin     | Yes | NSAID                  | CD19         | B Cell Lymphoma               | Tumor Burden | Sensitized tumor cells to CAR T cells by inducing oxidative stress which led to increased death receptor surface expression                                           | 35882449 |
| 23 | Paclitaxel      | Yes | Anti-Microtubule Agent | T4           | Epithelial Ovarian Cancer     | Tumor Burden | Induced tumor cell apoptosis and promoted cell cycle arrest offering additive benefit to CAR T cell therapy                                                           | 30167862 |
| 24 | Rimiducid       | Yes | Dimerizing Agent       | IL-1RAP      | Acute Myeloid Leukemia        | Tumor Burden | Eliminated tumor cells that were resistant to CAR T cell therapy whose resistance was driven by epitope masking                                                       | 33414517 |
| 25 | Sodium Butyrate | No  | HDAC Inhibitor         | CEA          | Colorectal Cancer             | Tumor Burden | Increased antigen expression on tumor cells and improved cytotoxic effect of CAR T cells which may be of resistant to other chemotherapy resistant models             | 30075754 |
| 26 | THZ1            | No  | Broad Kinase Inhibitor | EGFR         | Triple Negative Breast Cancer | Tumor Burden | Overcame tumor acquired CAR T cell resistance through transcriptional reprogramming preventing further resistance, tumor growth, and metastasis                       | 33875483 |

|    |                                     |     |                            |                       |                            |                         |                                                                                                                                                       |          |
|----|-------------------------------------|-----|----------------------------|-----------------------|----------------------------|-------------------------|-------------------------------------------------------------------------------------------------------------------------------------------------------|----------|
| 27 | Trametinib                          | Yes | MEK Inhibitor              | GD2                   | Melanoma                   | Tumor Burden            | Used in the clinic to treat melanoma, need to see if can be used in combination but little impact on CAR T cell function individually                 | 25415284 |
| 28 | Vemurafenib                         | Yes | MAPK Inhibitor             | GD2                   | Melanoma                   | Tumor Burden            | Used in the clinic to treat melanoma, need to see if can be used in combination but compound did impair CAR T cells at plasma relevant concentrations | 25415284 |
| 29 | Zanubrutinib                        | Yes | Src Kinase Inhibitor       | CD19                  | Lymphoblastoma             | Tumor Burden            | Induced dose dependent toxicity on tumor cells and CAR T cells                                                                                        | 36254554 |
| 30 | DMXAA                               | No  | STING Agonist              | Neu                   | Breast Cancer              | Infiltration            | Improved infiltration of traditional Th1 type CAR T cells but more significantly synergized with Th/Tc17 CAR T cell phenotypes                        | 33382402 |
| 31 | Docetaxel                           | Yes | Anti-Neoplastic Agent      | HER-2                 | Non-Small Cell Lung Cancer | Infiltration            | Increased the recruitment and infiltrative capacity of CAR T cells through a potential CXCL11 mechanism                                               | 30744691 |
| 32 | Rapamycin                           | Yes | mTOR Inhibitor             | EpCAM                 | Acute Myeloid Leukemia     | Infiltration            | Improved the capacity of CAR T cells to infiltrate into the bone marrow by modulating mTOR target CXCR4                                               | 34233960 |
| 33 | All trans retanoic acid (tretinoin) | Yes | Vitamin A Derived Retinoid | FGFR4                 | Rhabdomyosarcoma           | Immune Microenvironment | Targets myeloid derived suppressor cells                                                                                                              | 35877472 |
| 34 | BLZ945                              | No  | CSF1R Inhibitor            | B7-H3                 | Glioma                     | Immune Microenvironment | Depleted tumor associated macrophages but was actually detrimental to CAR T cell efficacy                                                             | 37971169 |
| 35 | Carboplatin                         | Yes | Alkylating Agent           | Lewis Y antigen (LeY) | Prosate cancer             | Immune Microenvironment | Improved the efficacy of CAR T cell treatment but the response was dependent on the changes induced by the tumor microenvironment                     | 37660083 |

|    |                                  |     |                       |       |                                    |                         |                                                                                                                                          |          |
|----|----------------------------------|-----|-----------------------|-------|------------------------------------|-------------------------|------------------------------------------------------------------------------------------------------------------------------------------|----------|
| 36 | Cyclophosphamide                 | Yes | Lymphodepleting Agent | CD19  | Raji tumors                        | Immune Microenvironment | Depleted tumor associated Tregs                                                                                                          | 21487038 |
| 37 | Cyclophosphamide                 | Yes | Lymphodepleting Agent | CD19  | Raji tumors                        | Immune Microenvironment | Contributed to tumor clearance in combination with CAR T cells                                                                           | 18477047 |
| 38 | Cyclophosphamide                 | Yes | Lymphodepleting Agent | CEA   | Colon Cancer, Breast Cancer        | Immune Microenvironment | Aided in tumor clearance of initially established tumors and helped induce tumor immunity in re-challenged settings                      | 33796409 |
| 39 | Cyclophosphamide                 | Yes | Lymphodepleting Agent | PSCA  | Prostate, Pancreatic               | Immune Microenvironment | Dampened immunosuppressive microenvironment and supported pro-inflammatory microenvironment                                              | 33647456 |
| 40 | Cyclophosphamide and Fludarabine | Yes | Lymphodepleting Agent | CD19  | B Cell Leukemia                    | Immune Microenvironment | Downregulated IDO expression                                                                                                             | 25940712 |
| 41 | Cyclophosphamide and Fludarabine | Yes | Lymphodepleting Agent | B7-H3 | Canine Sarcoma                     | Immune Microenvironment | Demonstrated efficacy of CAR T cells in canine sarcoma with cyclophosphamide and fludarabine successfully used as lymphodepleting agents | 35405743 |
| 42 | Docetaxel                        | Yes | Anti-Neoplastic Agent | PSMA  | Prostate Cancer                    | Immune Microenvironment | Improved cytotoxic effect of CAR T cells by diminishing the frequency and immunosuppressive capacity of MDSCs                            | 35962287 |
| 43 | Epacadostat                      | Yes | IDO1 Inhibitor        | FGFR4 | Rhabdomyosarcoma                   | Immune Microenvironment | Prompted the successful clearance of RMS tumors using a polypharmacy approach                                                            | 35877472 |
| 44 | Epacadostat                      | Yes | IDO-1 Inhibitor       | MSLN  | Esophageal Squamous Cell Carcinoma | Immune Microenvironment | Prevented the accumulation of the immunosuppressive metabolite, kynurenine, which enhanced cytotoxic potential                           | 33828565 |
| 45 | L-NAME                           | No  | iNOS Inhibitor        | FGFR4 | Rhabdomyosarcoma                   | Immune Microenvironment | Prompted the successful clearance of RMS tumors using a polypharmacy approach                                                            | 35877472 |

|    |                    |     |                                   |                |                               |                         |                                                                                                                                                                               |          |
|----|--------------------|-----|-----------------------------------|----------------|-------------------------------|-------------------------|-------------------------------------------------------------------------------------------------------------------------------------------------------------------------------|----------|
| 46 | Oxamate            | No  | Lactate Dehydrogenase A Inhibitor | EGFRvIII       | Glioblastoma                  | Immune Microenvironment | Modulated the immunosuppressive microenvironment by reducing promoter activity of Treg populations and restraining chemokine activity in macrophages                          | 37770937 |
| 47 | Pexidartinib       | Yes | CSF1R Inhibitor                   | FGFR4          | Rhabdomyosarcoma              | Immune Microenvironment | targets M2 like TAMs                                                                                                                                                          | 35877472 |
| 48 | PI-3065            | No  | PI3K Inhibitor                    | ROR1, EGFRvIII | Breast                        | Immune Microenvironment | Nanoparticle loaded sheets improved CAR T cell effector function through remodeling of the immune microenvironment                                                            | 29760047 |
| 49 | SD-208             | No  | TGF $\beta$ Inhibitor             | FGFR4          | Rhabdomyosarcoma              | Immune Microenvironment | Protected CAR T cells from inhibitory effect of TGF- $\beta$ and reduced PD-1 expression within a polypharmacy approach                                                       | 36722406 |
| 50 | SD-208             | No  | TGF $\beta$ Inhibitor             | ROR1           | Triple-Negative Breast Cancer | Immune Microenvironment | Protected CAR T cells from inhibitory effect of TGF- $\beta$ and reduced PD-1 expression within a polypharmacy approach                                                       | 32303620 |
| 51 | 7DW8-5             | No  | Immunostimulatory Glycolipid      | ROR1, EGFRvIII | Breast                        | Immune Microenvironment | Nanoparticle loaded sheets improved CAR T cell effector function through remodeling of the immune microenvironment                                                            | 29760047 |
|    |                    |     |                                   |                |                               |                         |                                                                                                                                                                               |          |
| 52 | Acalabrutinib      | Yes | Src Kinase Inhibitor              | CD19           | Lymphoblastoma                | Fitness                 | Improved in vitro persistence and in vivo tumor clearance,                                                                                                                    | 31899702 |
| 53 | AKT Inhibitor VIII | No  | PI3K Inhibitor                    | CD19           | B cell leukemia               | Fitness                 | Minimized differentiation of CAR T cells through induced regulation of the FOXO1 transcription factor                                                                         | 29212954 |
| 54 | Carboplatin        | Yes | Alkylating Agent                  | ErbB           | Epithelial ovarian cancer     | Fitness                 | Tumor pre-treatment with noncytotoxic doses of carboplatin sensitized EOC tumors to CAR T cells resulting in better disease regression while using lower doses of CAR T cells | 23898037 |

|    |                         |     |                       |       |                                         |         |                                                                                                                   |          |
|----|-------------------------|-----|-----------------------|-------|-----------------------------------------|---------|-------------------------------------------------------------------------------------------------------------------|----------|
| 55 | Carboplatin             | Yes | Alkylating Agent      | EGFR  | Breast cancer (TNBC; MDA-MDB-468 cells) | Fitness | Improved CAR T cell cytotoxic activity in vitro                                                                   | 35813488 |
| 56 | Celecoxib and aspirin   | Yes | COX1/2 Inhibitors     | CD19  | B Cell Lymphoma                         | Fitness | COX inhibition induced tumor cell apoptosis but impaired quality of CAR T cells                                   | 34122428 |
| 57 | Dasatinib               | Yes | Src Kinase Inhibitor  | GD2   | B Lymphoid Leukemia                     | Fitness | Promoted memory phenotype, decreased exhaustion markers, and increased effector cytokine production               | 33795428 |
| 58 | Dasatinib               | Yes | Src Kinase Inhibitor  | GRP78 | Acute Myeloid Leukemia                  | Fitness | Prevented CAR T cell antigen mediated differentiation which improved cytotoxicity                                 | 35102167 |
| 59 | Dasatinib               | Yes | Src Kinase Inhibitor  | CD19  | B Lymphoid Leukemia                     | Fitness | Served as a safety switch for CAR T cell by limiting cytotoxicity, cytokine secretion, and proliferation          | 30814055 |
| 60 | Dasatinib               | Yes | Src Kinase Inhibitor  | CD19  | Lymphoblastoma                          | Fitness | Paused CAR T cell intracellular signaling transduction by interfering with upstream kinase activity               | 31270272 |
| 61 | Dasatinib               | Yes | Src Kinase Inhibitor  | CD19  | B Lymphoid Leukemia                     | Fitness | Decreased exhaustion, differentiation and apoptosis related gene signatures                                       | 34289897 |
| 62 | Dasatinib and Ibrutinib | Yes | Src Kinase Inhibitor  | CD7   | T cell Leukemia                         | Fitness | Minimized tonic signaling induced fratricide on the CAR T cell and improved persistence and tumor control         | 36086817 |
| 63 | Decitabine              | Yes | Hypomethylating Agent | CD19  | Lymphoblastoma                          | Fitness | Enhanced memory phenotype, proliferation, and cytokine production of CAR T cells while also mitigating exhaustion | 33462245 |

|    |                                    |     |                                            |                    |                                       |         |                                                                                                                                                                |          |
|----|------------------------------------|-----|--------------------------------------------|--------------------|---------------------------------------|---------|----------------------------------------------------------------------------------------------------------------------------------------------------------------|----------|
| 64 | Decitabine                         | Yes | Hypomethylating Agent                      | CD123              | Leukemia                              | Fitness | Epigenetically reprogrammed CAR T cells which decreased methyltransferase expression leading to decreased exhaustion markers and enhanced memory phenotype     | 32973749 |
| 65 | Dexamethasone                      | Yes | Anti-Inflammatory Synthetic Glucocorticoid | IL13Ra2            | Glioblastoma                          | Fitness | Identified threshold that which dexamethasone is harmful for CAR T cells                                                                                       | 35081104 |
| 66 | Dexamethasone                      | Yes | Anti-Inflammatory Synthetic Glucocorticoid | IL13Ra2            | Glioblastoma                          | Fitness | Dex is commonly used in GBM treatment, low doses do not impact CAR T cell functionality - but do not necessarily help either                                   | 29103912 |
| 67 | Dexamethasone                      | Yes | Anti-Inflammatory Synthetic Glucocorticoid | CD19, CS-1, TAG-72 | ALL, Multiple Myeloma, Ovarian Cancer | Fitness | Dex increases IL-7 receptor expression on CAR T cells, further combination with IL-7 enhanced anti-tumor activity                                              | 38140726 |
| 68 | Dexamethasone and methylprednisone | Yes | Anti-Inflammatory Synthetic Glucocorticoid | CD19, MSLN         | Leukemia                              | Fitness | Exposure to GCs impairs CAR T cell activity but is reversed when GCs are removed, Important when GCs are used to control CRS but cytotoxicity is still desired | 38475830 |
| 69 | Docetaxel                          | Yes | Anti-Neoplastic Agent                      | PSMA               | Prostate Cancer                       | Fitness | Combinatorial treatment proved to have additive effect at killing antigen positive tumor cells                                                                 | 32728611 |
| 70 | Enasidenib                         | Yes | IDH2 Inhibitor                             | CD19               | Leukemia, Osteosarcoma                | Fitness | Enhances persistence, expansion, and memory CAR T cell formation through enhanced glycolytic activity and reduced reactive oxygen species formation            | 38171332 |
| 71 | Ibrutinib                          | Yes | Src Kinase Inhibitor                       | CD19               | Chronic Lymphocytic Leukemia          | Fitness | Increased CAR T cell viability and expansion while decreasing differentiation and exhaustion markers and improving cytokine release                            | 32683672 |



|    |                              |     |                           |             |                              |         |                                                                                                                                                                 |          |
|----|------------------------------|-----|---------------------------|-------------|------------------------------|---------|-----------------------------------------------------------------------------------------------------------------------------------------------------------------|----------|
| 72 | Ibrutinib                    | Yes | Src Kinase Inhibitor      | CD19        | Lymphoblastoma               | Fitness | Decreased exhaustion marker and displayed better combined tumor control when added to CAR T cells                                                               | 32876369 |
| 73 | Ibrutinib                    | Yes | Src Kinase Inhibitor      | CD19        | Mantle Cell Lymphoma         | Fitness | Enhanced CAR T cell killing and improved long term remission of mice and exhaustion markers in vivo                                                             | 26819453 |
| 74 | Ibrutinib                    | Yes | Src Kinase Inhibitor      | CD19        | Chronic Lymphocytic Leukemia | Fitness | Improves CAR T cell engraftment supporting greater tumor clearance                                                                                              | 26813675 |
| 75 | Ibrutinib                    | Yes | Src Kinase Inhibitor      | CD19        | Lymphoblastoma               | Fitness | Improved in vitro persistence, in vivo tumor clearance, and promoted a memory phenotype.                                                                        | 31899702 |
| 76 | Idelalisib                   | Yes | PI3K Inhibitor            | CD19        | Chronic Lymphocytic Leukemia | Fitness | Enriched the naive T CAR T cell fraction, increased lymph node homing markers, and decreased exhaustion marker expression                                       | 30737788 |
| 77 | IPI-145,CAL-101, or TGR-1202 | No  | PI3K Inhibitor            | MSLN        | Melanoma                     | Fitness | Dual blockade of the gamma and delta subunits of PI3K impaired cell function but individual use with either inhibitor improved anti-tumor function              | 32383488 |
| 78 | JQ1                          | No  | BET Bromodomain Inhibitor | EGFR        | Glioblastoma                 | Fitness | Suppressed the transcriptional expression of CAR T cell induced immunosuppressive genes supporting cytotoxic targeting of tumor cells                           | 34058385 |
| 79 | JQ1                          | No  | BET Bromodomain Inhibitor | CD19        | Chronic Lymphocytic Leukemia | Fitness | Reinvigorated exhausted CAR T cells through increased CAR expansion, proliferation, and metabolic fitness                                                       | 34396987 |
| 80 | Lenalidomide                 | Yes | Immunomodulatory Agent    | CD133, HER2 | Glioblastoma, Breast Cancer  | Fitness | Increased CAR T effector function (proliferation, cytokine secretion, and killing) through drug regulated degradation of T cell essential transcription factors | 32967454 |

|    |              |     |                        |            |                                             |         |                                                                                                                                                                    |          |
|----|--------------|-----|------------------------|------------|---------------------------------------------|---------|--------------------------------------------------------------------------------------------------------------------------------------------------------------------|----------|
| 81 | Lenalidomide | Yes | Immunomodulatory Agent | CD19, BCMA | Lymphoblastoma                              | Fitness | Drug regulated degradable IL-7 system that enhanced CAR T cell expansion, memory status, and persistence and antitumor activity of CAR T cells                     | 38123696 |
| 82 | Lenalidomide | Yes | Immunomodulatory Agent | NKG2D      | Colorectal Cancer                           | Fitness | Improved in vitro cytotoxicity and effector cytokine production                                                                                                    | 37790973 |
| 83 | Lenalidomide | Yes | Immunomodulatory Agent | CD23       | Chronic Lymphocytic Leukemia                | Fitness | Improved CAR T cell migration and preserved the functionality of CAR T cell immune synapse improving effector function                                             | 35259043 |
| 84 | Lenalidomide | Yes | Immunomodulatory Agent | CD19       | Lymphoblastoma                              | Fitness | Served as an "ON" and "OFF" supporting the activation or degradation of CAR T cells which improved antitumor activity while limiting inflammatory cytokine release | 33408186 |
| 85 | Lenalidomide | Yes | Immunomodulatory Agent | CD19       | Lymphoblastic Leukemia                      | Fitness | Controlled effector function of degranulated CAR T cells to better regulate activity and minimize off-target toxicities                                            | 33333026 |
| 86 | Lenalidomide | Yes | Immunomodulatory Agent | BCMA       | Multiple Myeloma                            | Fitness | Enhanced cytokine production, cytolytic activity, activation, and decreased exhaustion markers improving in vivo tumor clearance                                   | 31395689 |
| 87 | Lenalidomide | Yes | Immunomodulatory Agent | CS1        | Multiple Myeloma                            | Fitness | Supported increased cytotoxicity and persistence in vivo with improved memory phenotype, Th1 cytokine production, and immune synapse formation                     | 29061640 |
| 88 | LY294002     | No  | PI3K Inhibitor         | NKG2D      | Breast Cancer, Lung Cancer                  | Fitness | Supported CAR T cell survival and prevented exhaustion by upregulating anti-apoptotic proteins                                                                     | 35965586 |
| 89 | LY294002     | No  | PI3K Inhibitor         | NKG2D      | Chronic Myeloid Leukemia, Pancreatic Cancer | Fitness | Decreased antigen expression on activated CAR T cells diminishing fratricidal cell death                                                                           | 30619300 |

|     |             |     |                        |                                   |                        |         |                                                                                                                                   |          |
|-----|-------------|-----|------------------------|-----------------------------------|------------------------|---------|-----------------------------------------------------------------------------------------------------------------------------------|----------|
| 90  | LY294002    | No  | PI3K Inhibitor         | CD33                              | Acute Myeloid Leukemia | Fitness | Improved persistence by mediating a less differentiated state and decreasing tonic CAR T cell signaling                           | 29479065 |
| 91  | Metformin   | Yes | Antihyperglycemic      | CD19                              | Lymphoma               | Fitness | Suppressed the AMPK pathway which negatively influenced proliferation and cytotoxicity of CAR T cells                             | 29662316 |
| 92  | Paclitaxel  | Yes | Anti-Microtubule Agent | ICAM-1                            | Gastric Cancer         | Fitness | Enhanced anti-tumor activity of CAR T cells in vivo                                                                               | 32995483 |
| 93  | Rapamycin   | Yes | mTOR Inhibitor         | CD123,HER2, CD33                  | Acute Myeloid Leukemia | Fitness | Used as a pro-apoptotic compound that allowed for in vivo clearance control of CAR cells to better mitigate off target toxicities | 32384544 |
| 94  | Rapamycin   | Yes | mTOR Inhibitor         | BCMA,CD123 (Natural Killer Cells) | Acute Myeloid Leukemia | Fitness | Used as a safety switch to regulate the elimination of expanded effector cells                                                    | 32384544 |
| 95  | Rapamycin   | Yes | mTOR Inhibitor         | IL-1RAP                           | Acute Myeloid Leukemia | Fitness | Used as a safety switch to regulate the elimination of expanded effector cells                                                    | 37173386 |
| 96  | Rapamycin   | Yes | mTOR Inhibitor         | CD19,BCMA                         | Lymphoma               | Fitness | Allowed for selective activation of CAR T cells only in the presence of both the antigen and the dimerizing compound              | 31039141 |
| 97  | Rapamycin   | Yes | mTOR Inhibitor         | CD19                              | Lymphoblastoma         | Fitness | Promoted a less differentiated, stem cell like memory phenotype                                                                   | 30890531 |
| 98  | Rapamycin   | Yes | mTOR Inhibitor         | CD19                              | Lymphoblastoma         | Fitness | Utilized rapamycin as a caspase regulating compound to initiate CAR T cell suicide and minimize toxicity                          | 29661681 |
| 99  | Regorafenib | Yes | Broad Kinase Inhibitor | EpCAM (Natural Killer Cell)       | Colorectal Cancer      | Fitness | Supported greater in vivo tumor control through enhanced persistence                                                              | 30410941 |
| 100 | Rimiducid   | Yes | Dimerizing Agent       | SLAMF7                            | Multiple Myeloma       | Fitness | Performed as a suicide switch on CAR T cells to better control off target toxicities to antigen containing leukocytes             | 30740516 |

|     |              |     |                        |                  |                        |                          |                                                                                                                                                               |          |
|-----|--------------|-----|------------------------|------------------|------------------------|--------------------------|---------------------------------------------------------------------------------------------------------------------------------------------------------------|----------|
| 101 | Rimiducid    | Yes | Dimerizing Agent       | CD123,HER2, CD33 | Acute Myeloid Leukemia | Fitness                  | Used as a pro-stimulatory compound that enhanced CAR T cell proliferation, cytokine secretion, and cytotoxicity                                               | 30740516 |
| 102 | Ruxolitinib  | Yes | Janus Kinase Inhibitor | CD19             | Lymphoblastoma         | Fitness                  | Inhibited proliferation without damaging viability or effector function of the CAR T cells which helped mitigate cytokine release syndrome related toxicities | 35101664 |
| 103 | SCH-58261    | No  | A2a Receptor Inhibitor | CD19             | Leukemia               | Fitness                  | CAR T cells were loaded with vesicles carrying SCH supporting higher CAR T cell engraftment and enhanced functionality                                        | 29720380 |
| 104 | SCH-58261    | No  | A2a Receptor Inhibitor | MSLN             | Ovarian Adenocarcinoma | Fitness                  | Adenosine signaling was exogenously activated and co-incubation with SCH reversed loss of CAR T cell effector function and cytokine secretion                 | 32151275 |
| 105 | Temozolomide | Yes | Alkylating Agent       | EGFRvIII         | Glioblastoma           | Fitness                  | Served as a lymphodepleting agent prior to CAR delivery which improved the abundance and persistence of cells                                                 | 29872570 |
| 106 | THZ1         | No  | Broad Kinase Inhibitor | CD19             | Lymphoma               | Fitness                  | Protecte against cytokine release syndrome associated toxicities by diminishing polymerase mediated transcriptional activity                                  | 33397398 |
| 107 | Trametinib   | Yes | MEK Inhibitor          | GD2              | Neuroblastoma          | Fitness                  | Enhanced in vitro tumor cell killing while sparing exhaustion and promoting expansion                                                                         | 34382720 |
|     |              |     |                        |                  |                        |                          |                                                                                                                                                               |          |
| 108 | Azacitidine  | Yes | Hypomehylating Agent   | CD123            | Acute Myeloid Leukemia | Antigen Dilemma, Fitness | Upregulated antigen expression and induced clonal outgrowth of exhaustion marker negative, CAR positive T cells that had increased killing potency            | 34750374 |

|     |              |     |                        |               |                                 |                               |                                                                                                                                                      |          |
|-----|--------------|-----|------------------------|---------------|---------------------------------|-------------------------------|------------------------------------------------------------------------------------------------------------------------------------------------------|----------|
| 109 | Decitabine   | Yes | Hypomethylating Agent  | NY-ESO-1      | Breast Cancer, Multiple Myeloma | Antigen Dilemma, Fitness      | Upregulated antigen expression on tumor cells leading to increased killing which also correlated with higher interferon gamma production             | 26447882 |
| 110 | S63845       | No  | Mcl-1 Inhibitor        | CD19          | B-cell Malignancies             | Antigen Dilemma/ Tumor Burden | Increased CD19 expression and induced tumor cell apoptosis                                                                                           | 33362794 |
| 111 | Venetoclax   | yes | Bcl-2 Inhibitor        | CD19          | B-cell Malignancies             | Antigen Dilemma/ Tumor Burden | Increased CD19 expression and induced tumor cell apoptosis where one out of three delivery methods tested was able to prevent CAR T cell damage      | 33362794 |
| 112 | Venetoclax   | yes | Bcl-2 Inhibitor        | CD19          | Multiple Lymphoma Models        | Antigen Dilemma/ Tumor Burden | Overexpressed Bcl2(F104L) to protect CAR T cell from venetoclax toxicities                                                                           | 35904479 |
| 113 | Cisplatin    | Yes | Alkylating Agent       | HER2          | Lung Cancer                     | Fitness, Infiltration         | Cisplatin-loaded CAR T cells (via membrane coated polymeric nanoparticles) resulted in better anti-tumor response and homing.                        | 38282968 |
| 114 | Lenalidomide | Yes | Immunomodulatory Agent | CD19          | B Cell Lymphoma                 | Fitness, Infiltration         | Polarized CD8+ cells to less differentiated state, increased expansion, suppressed VEGF production supporting infiltration, and minimized exhaustion | 37219767 |
| 115 | Lenalidomide | Yes | Immunomodulatory Agent | Wilms Tumor 1 | Chronic Myelogenous Leukemia    | Fitness, Infiltration         | Increased infiltration of both CD3/8+ T cells and improves anti-tumor activity                                                                       | 34674611 |
| 116 | Lenalidomide | Yes | Immunomodulatory Agent | CD19,CD20     | B-cell non-Hodgkin Lymphoma     | Fitness, Infiltration         | Increased interferon gamma production and infiltration of CAR positive cells which supported greater anti-tumor activity                             | 27141398 |
| 117 | Lenalidomide | Yes | Immunomodulatory Agent | EGFRvIII      | Glioblastoma                    | Fitness, Infiltration         | Improved interferon gamma production, migration of CAR T cells to tumor site, and enhanced immune synapse formation improving tumor control          | 26450624 |

|     |                                     |     |                        |        |                                  |                                       |                                                                                                                                                                                                                                                                                                             |          |
|-----|-------------------------------------|-----|------------------------|--------|----------------------------------|---------------------------------------|-------------------------------------------------------------------------------------------------------------------------------------------------------------------------------------------------------------------------------------------------------------------------------------------------------------|----------|
| 118 | Sorafenib                           | Yes | Broad Kinase Inhibitor | GPC3   | Hepatocellular Cancer            | Immune Microenvironment, Tumor Burden | Promoted IL-12 secretion in tumor associated macrophages and induced tumor cell apoptosis                                                                                                                                                                                                                   | 31078430 |
| 119 | Oxaliplatin (with cyclophosphamide) | Yes | Alkylating Agent       | ROR1   | Lung Cancer                      | Infiltration, Immune Microenvironment | Improves CAR-T cell-mediated tumor control and survival when combined with cyclophosphamide by activating tumor macrophages to express T-cell-recruiting chemokines, resulting in improved CAR-T cell infiltration, remodeling of the tumor microenvironment, and increased tumor sensitivity to anti-PD-L1 | 33357452 |
| 120 | Azacitidine                         | Yes | Hypomethylating Agent  | CD44v6 | Acute Myeloid Leukemia           | Tumor Burden, Fitness                 | Increased the activation, persistence, and promoted a memory phenotype of CAR T cells while also inducing tumor cell apoptosis                                                                                                                                                                              | 37180104 |
| 121 | Decitabine                          | Yes | Hypomethylating Agent  | CD44v6 | Acute Myeloid Leukemia           | Tumor Burden, Fitness                 | Increased the activation, persistence, and promoted a memory phenotype of CAR T cells while also inducing tumor cell apoptosis (more profound than azacitidine)                                                                                                                                             | 37180104 |
| 122 | Eltanexor                           | No  | XPO-1 Inhibitor        | CD19   | Lymphoma, Acute Myeloid Leukemia | Tumor Burden, Fitness                 | Pretreatment of tumor cells with inhibitor sensitized them to CAR T cell therapy by decreasing tumor cell viability and mitigating exhaustion                                                                                                                                                               | 34165175 |
| 123 | Ibrutinib                           | Yes | Src Kinase Inhibitor   | CD19   | Lymphoblastoma                   | Tumor Burden, Fitness                 | Induced dose dependent toxicity on tumor cells and CAR T cells but decreased exhaustion markers and had better anti-tumor effect                                                                                                                                                                            | 36254554 |

|     |            |     |                           |            |                                  |                                                        |                                                                                                                                                              |          |
|-----|------------|-----|---------------------------|------------|----------------------------------|--------------------------------------------------------|--------------------------------------------------------------------------------------------------------------------------------------------------------------|----------|
| 124 | JQ1        | No  | BET Bromodomain Inhibitor | CD19,CD123 | Acute Myeloid Leukemia           | Tumor Burden, Fitness                                  | Decreased immunosuppressive ligand on tumor cells and their respective receptors on CAR T cells supporting anti-tumor activity                               | 36038554 |
| 125 | Linsitinib | Yes | IGF1R/IR Inhibitor        | GD2        | Diffuse Midline Glioma           | Tumor Burden, Fitness                                  | Induced tumor cell apoptosis while not affecting CAR T cell viability and increased memory phenotype expression as well as decreased exhaustion markers      | 34964902 |
| 126 | Metformin  | Yes | Antihyperglycemic         | CEA        | Gastric Cancer                   | Tumor Burden, Fitness                                  | Blocked tumor specific aerobic glycolysis while upregulating CAR T cell oxidative phosphorylation and energy metabolism                                      | 36827893 |
| 127 | Rapamycin  | Yes | mTOR Inhibitor            | CD19       | B cell Lymphoma                  | Tumor Burden, Fitness,                                 | Inhibited tumor specific immune evasion and anti-apoptic mechanisms while working in tandem with engineered rapamycin resistant CAR T cells                  | 21878902 |
| 128 | Selinexor  | Yes | XPO-1 Inhibitor           | CD19       | Lymphoma, Acute Myeloid Leukemia | Tumor Burden, Fitness                                  | Pretreatment of tumor cells with inhibitor sensitized them to CAR T cell therapy by decreasing tumor cell viability and mitigating exhaustion                | 34165175 |
| 129 | JK184      | No  | Hedgehog Inhibitor        | B7-H3      | Breast Cancer                    | Tumor Burden, Infiltration                             | Promoted tumor cell apoptosis and CAR T cell trafficking and infiltration to the tumor site which corresponded to increased inflammatory cytokine production | 36635683 |
| 130 | Sunitinib  | Yes | Broad Kinase Inhibitor    | CAIX       | Renal Cancer                     | Antigen Dilemma, Infiltration, Immune Microenvironment | Upregulated antigen expression on tumor cells, promoted CAR T cell infiltration, and reduced the abundance and frequency of myeloid derived suppressor cells | 31574023 |

|     |                         |     |                                |          |                             |                                                |                                                                                                                                       |          |
|-----|-------------------------|-----|--------------------------------|----------|-----------------------------|------------------------------------------------|---------------------------------------------------------------------------------------------------------------------------------------|----------|
| 131 | Metformin and Rapamcyin | Yes | AMPK Activator, mTOR Inhibitor | EGFRvIII | Glioblastoma                | Fitness, Immune Microenvironment, Tumor Burden | Pretreated CAR T cells had better persistence and anti-tumor activity under impairing hypoxic conditions along with fewer MDSCs       | 38386420 |
| 132 | TY-52156                | No  | S1P3 Receptor Antagonist       | EpCAM    | Breast Cancer, Colon Cancer | Fitness, Infiltration, Immune Microenvironment | Improved infiltration and effector function by remodeling the TME to promote pro-inflammatory macrophage polarization and recruitment | 37591632 |











































































































































































































|  |  |  |  |  |  |  |  |
|--|--|--|--|--|--|--|--|
|  |  |  |  |  |  |  |  |
|  |  |  |  |  |  |  |  |
|  |  |  |  |  |  |  |  |
